# Supplementary material
Source: MDPI journal article supplement (https://www.mdpi.com/2076-3417/11/20/9693)
Supplement: s1 [file s1]

[illegible]
